# Supplementary material for: Development of a Serum-Based MicroRNA Signature for Early Detection of Pancreatic Cancer: A Multicenter Cohort Study
Source: Springer Nature journal article supplement (doi:10.1007/s10620-024-08338-4), 2024-03-07
Supplement: MOESM1 [file 26829682]

## **Case/non-case Group Requirements**

### **Case requirements:**

- (1) Based on the diagnostic criteria of PCa and treatment specifications (2018 version);
- (2) Subjects with first diagnosis or relapse of PCa;
- (3) Before receiving surgical treatment, radiotherapy, and chemotherapy.

### **Non-case requirements**

- (1) Subjects of other pancreatic diseases, such as chronic pancreatitis, pancreatic cystadenoma, pancreatic pseudocyst, insulinoma, solid pseudopapilledema, etc.;
- (2) Subjects with diabetes and obesity. Diabetes: random blood glucose >11.1 mmol/L, fasting blood glucose >7 mmol/L, or glucose load >11.1 mmol/L (post 2 hours); Obesity: BMI  $\geq$  28 Kg/m<sup>2</sup>;
- (3) Subjects with other digestive tract diseases, such as abdominal pain, jaundice, etc.;
- (4) Subjects with other digestive tract/digestive system tumors, such as liver cancer, gastric cancer, esophageal cancer, bowel cancer, etc.

## **Inclusion and Exclusion Criteria**

### **Inclusion criteria**

- (1) Aged  $\geq$ 18 years old, gender unlimited;
- (2) Serum samples from individuals who meet the requirements of the case group/non-case group;
- (3) The minimum requirement of serum volume is 1 mL;
- (4) Subjects met the hospital's informed consent process or voluntarily signed the informed consent form.

### **Exclusion criteria**

- (1) Samples with insufficient serum;
- (2) Hemolytic sample;
- (3) Storage, transportation, treatment, and other samples that do not meet the requirements;
- (4) Multiple samples of the same subject;
- (5) Other situations that the researcher believes need to be excluded.

### **Rejection criteria**

- (1) Incomplete case data (information);
- (2) Detection failure due to unqualified sample quality, test operation, and other reasons;
- (3) Other situations that the researcher believes need to be eliminated.
