# Supplementary material for: Development of a Serum-Based MicroRNA Signature for Early Detection of Pancreatic Cancer: A Multicenter Cohort Study
Source: Springer Nature journal article supplement (doi:10.1007/s10620-024-08338-4), 2024-03-07
Supplement: MOESM2 [file 26829682]

## Supplementary Tables

**Table S1.** Performance of the miRNA panel tested in subjects with PDAC at stages (TNM) compared with that of HC

| Stages (TNM)             | Subjects recruited | Subjects tested positive | Subjects tested negative | Specificity (95%CI) | Sensitivity (95%CI) | Accuracy (95%CI)    |
|--------------------------|--------------------|--------------------------|--------------------------|---------------------|---------------------|---------------------|
| <b>Training cohort</b>   |                    |                          |                          |                     |                     |                     |
| I                        | 69                 | 60                       | 9                        | 92.4% (88.7%-96.1%) | 94.2% (88.7%-99.7%) | 92.9% (92.8%-92.9%) |
| II                       | 108                | 91                       | 17                       | 89.3% (85.0%-93.6%) | 95.4% (91.4%-99.3%) | 91.5% (91.4%-91.5%) |
| III                      | 44                 | 35                       | 9                        | 89.3% (85.0%-93.6%) | 90.9% (82.4%-99.4%) | 89.6% (89.6%-89.7%) |
| IV                       | 30                 | 25                       | 5                        | 90.9% (86.8%-94.9%) | 93.3% (84.4%-92.9%) | 91.2% (91.1%-91.3%) |
| <b>Validation cohort</b> |                    |                          |                          |                     |                     |                     |
| I                        | 60                 | 54                       | 6                        | 92.4% (88.7%-96.1%) | 93.3% (87.0%-99.6%) | 92.6% (92.6%-92.7%) |
| II                       | 117                | 103                      | 14                       | 88.4% (83.9%-92.8%) | 96.6% (93.3%-99.9%) | 91.4% (91.4%-91.5%) |
| III                      | 48                 | 36                       | 12                       | 89.9% (85.7%-94.1%) | 91.7% (83.8%-99.5%) | 90.2% (90.2%-90.3%) |
| IV                       | 33                 | 27                       | 6                        | 90.4% (86.3%-94.5%) | 84.8% (72.6%-97.1%) | 89.6% (89.5%-89.7%) |

**Table S2.** Performance of the miRNA panel and common biomarkers in discriminating patients with early-stage PDAC from non- PDAC subjects (CP/HC) in the training cohort

| Scenario                     | Sensitivity (95%CI)   | Specificity (95%CI)    | Accuracy (95%CI)     | AUC (95%CI)          |
|------------------------------|-----------------------|------------------------|----------------------|----------------------|
| <b>miRNA panel</b>           |                       |                        |                      |                      |
| Early-stage PDAC vs non-PDAC | 93.8% (89.4%-98.2%)   | 75.7% (71.2%-80.2%)    | 80.1% (80.1%-80.2%)  | 0.924 (0.899-0.949)  |
| Early-stage PDAC vs CP       | 81.4% (74.2%-88.6%)   | 86.7% (76.7%-96.6%)    | 82.9% (82.7%-83.1%)  | 0.905 (0.853-0.956)  |
| Early-stage PDAC vs HC       | 92.9% (88.2%-97.6%)   | 92.9% (89.3%-96.5%)    | 92.9% (92.9%-92.9%)  | 0.971 (0.956-0.987)  |
| <b>CA125</b>                 |                       |                        |                      |                      |
| Early-stage PDAC vs non-PDAC | 81.2% (73.4%-89.1%)   | 53.7% (47.6%-59.8%)    | 61.3% (61.1%-61.4%)  | 0.677 (0.622-0.732)  |
| Early-stage PDAC vs CP       | 9.4% (3.5%-15.2%)     | 97.2% (91.9%-102.6%)   | 33.3% (33.0%-33.7%)  | 0.468 (0.358-0.578)  |
| Early-stage PDAC vs HC       | 82.3% (74.7%-89.9%)   | 66.0% (58.4%-73.6%)    | 72.4% (72.2%-72.5%)  | 0.719 (0.655-0.783)  |
| <b>CA19-9</b>                |                       |                        |                      |                      |
| Early-stage PDAC vs non-PDAC | 69.5% (60.7%-78.3%)   | 80.6% (76.0%-85.1%)    | 77.6% (77.5%-77.7%)  | 0.790 (0.732-0.849)  |
| Early-stage PDAC vs CP       | 52.4% (42.8%-61.9%)   | 94.7% (87.6%-101.8%)   | 63.6% (63.3%-64.0%)  | 0.688 (0.602-0.774)  |
| Early-stage PDAC vs HC       | 82.9% (75.6%-90.1%)   | 75.9% (69.5%-82.3%)    | 78.5% (78.4%-78.7%)  | 0.820 (0.763-0.878)  |
| <b>CA242</b>                 |                       |                        |                      |                      |
| Early-stage PDAC vs non-PDAC | 67.8% (55.9%-79.7%)   | 69.8% (63.8%-75.9%)    | 69.4% (69.2%-69.5%)  | 0.680 (0.598-0.762)  |
| Early-stage PDAC vs CP       | 54.2% (41.5%-66.9%)   | 100.0% (100.0%-100.0%) | 70.3% (69.9%-70.8%)  | 0.711 (0.606-0.816)  |
| Early-stage PDAC vs HC       | 67.8% (55.9%-79.7%)   | 72.7% (65.5%-79.8%)    | 71.3% (71.1%-71.5%)  | 0.682 (0.600-0.765)  |
| <b>CEA</b>                   |                       |                        |                      |                      |
| Early-stage PDAC vs non-PDAC | 82.7% (75.4%-90.0%)   | 41.2% (35.3%-47.1%)    | 52.8% (52.7%-53.0%)  | 0.580 (0.522-0.638)  |
| Early-stage PDAC vs CP       | 13.5% (6.9%-20.0%)    | 97.4% (92.3%-102.5%)   | 35.9% (35.6%-36.2%)  | 0.432 (0.319-0.546)  |
| Early-stage PDAC vs HC       | 98.1% (95.4%, 100.7%) | 26.7% (19.6%, 33.7%)   | 55.9% (55.7%, 56.1%) | 0.520 (0.448, 0.591) |

**Table S3.** Performance of the miRNA panel and common biomarkers in discriminating patients with early-stage PDAC from non-PDAC subjects (CP/HC) in the validation cohort

| Scenario                     | Sensitivity (95%CI) | Specificity (95%CI) | Accuracy (95%CI)   | AUC (95%CI)        |
|------------------------------|---------------------|---------------------|--------------------|--------------------|
| <b>miRNA panel</b>           |                     |                     |                    |                    |
| Early-stage PDAC vs non-PDAC | 95.1%(91.0%-99.3%)  | 77.0%(72.6%-81.4%)  | 81.1%(81.0%-81.2%) | 0.861(0.818-0.903) |
| Early-stage PDAC vs CP       | 80.6%(72.9%-88.2%)  | 82.2%(71.1%-93.4%)  | 81.1%(80.9%-81.3%) | 0.814(0.720-0.908) |
| Early-stage PDAC vs HC       | 94.2%(89.7%-98.7%)  | 92.4%(88.7%-96.1%)  | 93.0%(93.0%-93.1%) | 0.933(0.892-0.974) |
| <b>CA125</b>                 |                     |                     |                    |                    |
| Early-stage PDAC vs non-PDAC | 65.5%(55.5%-75.5%)  | 58.6%(52.5%-64.8%)  | 60.4%(60.3%-60.6%) | 0.621(0.540-0.701) |
| Early-stage PDAC vs CP       | 14.9%(7.5%-22.4%)   | 94.6%(87.3%-101.9%) | 38.7%(38.3%-39.1%) | 0.548(0.474-0.622) |
| Early-stage PDAC vs HC       | 69.0%(59.2%-78.7%)  | 72.9%(65.7%-80.2%)  | 71.4%(71.3%-71.6%) | 0.709(0.625-0.794) |
| <b>CA19-9</b>                |                     |                     |                    |                    |
| Early-stage PDAC vs non-PDAC | 63.5%(53.9%-73.2%)  | 63.5%(53.9%-73.2%)  | 78.7%(78.6%-78.8%) | 0.737(0.668-0.807) |
| Early-stage PDAC vs CP       | 46.9%(36.9%-56.9%)  | 94.7%(87.6%-101.8%) | 60.4%(60.1%-60.8%) | 0.708(0.623-0.793) |
| Early-stage PDAC vs HC       | 79.2%(71.0%-87.3%)  | 83.7%(78.1%-89.3%)  | 82.1%(82.0%-82.2%) | 0.815(0.746-0.883) |
| <b>CA242</b>                 |                     |                     |                    |                    |
| Early-stage PDAC vs non-PDAC | 78.1%(68.0%-88.3%)  | 66.4%(60.1%-72.6%)  | 69.0%(68.9%-69.2%) | 0.722(0.641-0.804) |
| Early-stage PDAC vs CP       | 65.6%(54.0%-77.3%)  | 87.9%(76.7%-99.0%)  | 73.2%(72.8%-73.6%) | 0.768(0.654-0.881) |
| Early-stage PDAC vs HC       | 78.1%(68.0%-88.3%)  | 70.8%(63.4%-78.3%)  | 73.1%(72.9%-73.3%) | 0.745(0.657-0.833) |
| <b>CEA</b>                   |                     |                     |                    |                    |
| Early-stage PDAC vs non-PDAC | 77.7%(69.2%-86.1%)  | 38.1%(32.2%-44.1%)  | 48.7%(48.6%-48.9%) | 0.579(0.507-0.651) |
| Early-stage PDAC vs CP       | 27.7%(18.6%-36.7%)  | 89.5%(79.7%-99.2%)  | 45.5%(45.1%-45.8%) | 0.586(0.492-0.680) |
| Early-stage PDAC vs HC       | 96.8%(93.3%-100.4%) | 15.3%(9.4%-21.2%)   | 47.5%(47.3%-47.7%) | 0.560(0.513-0.608) |

**Table S4.** Performance of the miRNA panel in discriminating patients with pancreatic cystic neoplasm (PCN) from early-stage PDAC subjects (CP/HC) in the training and validation cohorts

| Scenario                   | Sensitivity<br>(95%CI) | Specificity<br>(95%CI) | Accuracy<br>(95%CI) | AUC (95%CI)         | Positive<br>Predictive Value | Negative<br>Predictive Value |
|----------------------------|------------------------|------------------------|---------------------|---------------------|------------------------------|------------------------------|
| <b>Training cohort</b>     |                        |                        |                     |                     |                              |                              |
| PCN vs CP                  | 70.7 (61.7-79.7)       | 62.2 (48.1-76.4)       | 68.1 (67.8-68.4)    | 0.681 (0.588-0.773) | 80.5 (72.1-88.8)             | 49.1 (36.1-62.1)             |
| PCN vs HC                  | 79.8 (71.9-87.7)       | 77.2 (71.3-83.0)       | 78.0 (77.9-78.2)    | 0.841 (0.792-0.889) | 63.7 (55.2-72.2)             | 88.4 (83.6-93.2)             |
| PCN vs<br>Early-stage PDAC | 85.8 (79.4-92.3)       | 67.7 (58.5-76.9)       | 77.4 (77.2-77.5)    | 0.851 (0.802-0.901) | 75.2 (67.7-82.6)             | 80.7 (72.2-89.2)             |
| <b>Validation cohort</b>   |                        |                        |                     |                     |                              |                              |
| PCN vs CP                  | 64.0 (54.6-73.4)       | 53.3 (38.8-67.9)       | 60.7 (60.4-61.0)    | 0.587 (0.467-0.707) | 75.3 (66.1-84.5)             | 40.0 (27.6-52.4)             |
| PCN vs HC                  | 80.0 (72.2-87.8)       | 74.2 (68.2-80.3)       | 76.2 (76.1-76.3)    | 0.771 (0.702-0.841) | 61.1 (52.7-69.4)             | 88.0 (83.1-92.9)             |
| PCN vs<br>Early-stage PDAC | 90.3 (84.6-96.0)       | 69.0 (59.9-78.1)       | 79.8 (79.6-80.0)    | 0.796 (0.723-0.870) | 75.0 (67.4-82.6)             | 87.3 (80.0-94.7)             |

**Table S5.** Univariate and multivariate logistic regression analysis of risk factors of PCa

| Diseases                      | Univariate analysis |             |           | Multivariate analysis |             |           |
|-------------------------------|---------------------|-------------|-----------|-----------------------|-------------|-----------|
|                               | P value             | Estimate OR | 95%CI     | P value               | Estimate OR | 95%CI     |
| Sex                           | 0.02                | 0.77        | 0.61-0.96 | 0.47                  | 0.90        | 0.69-1.19 |
| Age                           | <0.0001             | 1.07        | 1.06-1.08 | <0.0001               | 1.07        | 1.06-1.08 |
| BMI, Kg/m <sup>2</sup>        | 0.006               | 1.04        | 1.01-1.08 | 0.18                  | 1.02        | 0.98-1.06 |
| Smoking history <sup>a</sup>  | 0.37                | 1.12        | 0.87-1.43 | NA                    | NA          | NA        |
| Drinking history <sup>b</sup> | 0.045               | 1.30        | 1.01-1.69 | 0.15                  | 1.26        | 0.92-1.71 |
| Family history of<br>cancer   | <0.0001             | 2.07        | 1.51-2.86 | <0.0001               | 2.63        | 1.81-3.86 |
| History of diabetes           | <0.0001             | 4.36        | 3.02-6.42 | <0.0001               | 2.30        | 1.55-3.47 |

<sup>a</sup> Current and former smoking history was considered as ever. <sup>b</sup> Drinking at least once a month or for more than half a year was considered as ever. p < 0.05 indicated significance. BMI was calculated by dividing a person's weight by the square of their height. OR, odds ratio. NA, not applicable.
